RESEARCH ARTICLE

# Real-world safety of Tepotinib: Insights from the Food and Drug Administration Adverse Event Reporting System

Su Wei, Lixi Zhang, Cuiping Liu, Xu Qi<sup>\*</sup>

Department of Respiratory and Critical Care Medicine, The First Affiliated Hospital of Nanjing Medical University, Nanjing, China

\* [qixunjmu@163.com](mailto:qixunjmu@163.com)

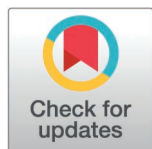

## Abstract

### Objects

Tepotinib is widely utilized for treating non-small cell lung cancer (NSCLC) patients with MET exon 14 (METex14) skipping mutations. The purpose of this study is to evaluate the safety characteristics of Tepotinib in the actual environment by analyzing data from the Food and Drug Administration Adverse Event Reporting System (FAERS) database.

### Methods

This study analyzed adverse event (AE) reports related to Tepotinib from FAERS database spanning Q1 2021 to Q4 2024. Four disproportionality analysis methods were employed: Reporting Odds Ratio (ROR), Proportional Reporting Ratio (PRR), Multi-Item Gamma Poisson Shrinker (MGPS), and Bayesian Confidence Propagation Neural Network (BCPNN). A descriptive analysis and a subgroup analysis of the time to onset (TTO) of AEs was conducted, and the Weibull distribution was used to predict temporal variations in AEs.

### Result

A total of 521 AE reports involving 1,385 AEs were included in this study. Of these, 69.50% were from the elderly population. The analysis confirmed several known AEs such as death, peripheral edema, diarrhea, and blood creatinine increased while also identifying previously unreported signals, including deafness and taste disorder. For females, special attention ought to be directed toward alopecia, deafness and abdominal pain upper. For males, the onset of interstitial lung disease, pruritus and constipation requires observation. The median time to onset (TTO) of AEs was 39 days, with 43.88% of AEs occurring in the first month of treatment initiation. Additionally, the individuals aged 75 years and over the experience AEs relatively early.

## OPEN ACCESS

**Citation:** Wei S, Zhang L, Liu C, Qi X (2025) Real-world safety of Tepotinib: Insights from the Food and Drug Administration Adverse Event Reporting System. PLoS One 20(12): e0339005. <https://doi.org/10.1371/journal.pone.0339005>

**Editor:** Claudio J. Salomon, National University of Rosario, ARGENTINA

**Received:** July 22, 2025

**Accepted:** December 1, 2025

**Published:** December 18, 2025

**Copyright:** © 2025 Wei et al. This is an open access article distributed under the terms of the [Creative Commons Attribution License](https://creativecommons.org/licenses/by/4.0/), which permits unrestricted use, distribution, and reproduction in any medium, provided the original author and source are credited.

**Data availability statement:** The datasets presented in this study can be found in online repositories. The names of the repository/repositories and accession number(s) can be found below: <https://fis.fda.gov/extensions/FPD-QDE-FAERS/FPD-QDE-FAERS.html>.

**Funding:** This study was supported by China Population Welfare Foundation (SLB-2-20240319-180), Health Development Promotion Project-Spark Program, Scientific Research Project (XHJH-0024), 'Six talent peaks' high-level talents level B (WSN-015), and Jiangsu Province 333 Senior Talent training Program.

**Competing interests:** The authors declare that the research was conducted in the absence of any commercial or financial relationships that could be construed as a potential conflict of interest.

## Conclusion

This study conducted a comprehensive evaluation of the real-world safety of Tepotinib. The study validates clinical assertions about Tepotinib's safety profile and identifies its novel signals, and also emphasized early monitoring of treatment. Our findings will better guide the clinical practice of Tepotinib and provide a basis for larger prospective studies in the future.

## Introduction

Lung cancer is one of the most aggressive and prevalent diseases, with an estimated 2.5 million new cases (12.4% of all cancers) and 1.8 million deaths (18.7% of all cancer deaths) in 2022 [1]. It is broadly categorized into small-cell and non-small-cell lung cancer (NSCLC), with the latter accounting for over 85% of cases. The most common histological subtypes of NSCLC are adenocarcinoma (40%) and squamous cell carcinoma (25%) [2]. In recent years, with the advent of the era of precision oncology, the field of pharmacological therapy for NSCLC has advanced quickly, and molecularly targeted therapy has exhibited remarkable efficacy. Patients with certain carcinogenic drivers, such as EGFR, ALK, HER2, ROS1, and more recently MET mutations, benefit greatly from targeted therapy [3]. The MET proto-oncogene encodes the tyrosine kinase receptor of hepatocyte growth factor (HGF). When the receptor binds to its ligand, MET can activate downstream signaling via the PI3K/AKT/ mTOR and RAS/ RAF/ MEK/ ERK pathways, thereby driving cell proliferation and migration. The main mechanisms of the oncogenic activation include protein overexpression, gene mutation, amplification and rearrangement [4,5]. Among them, METex14 skipping mutations and MET amplification are the two most significant manifestations of MET pathway disorders. At present, METex14 skipping is the sole therapeutic target for NSCLC patients with MET pathway disorders, and its related targeted drugs such as carmatinib, tepatinib, and sevotinib have completely changed the treatment mode and prognosis of patients [6].

Tepotinib is an effective, highly MET-selective, and highly oral bioavailability small molecule tyrosine kinase inhibitor (TKI), which has been approved by the FDA on February 3, 2021 [7]. In the context of METex14 skipping mutation, preclinical evidence indicates that Tepotinib potently inhibits MET pathway-related phosphorylation, suppressing tumor cell proliferation, survival, and metastasis [8]. VISION (NCT02864992) is a global, single-arm, multi-cohort, open-label phase II trial designed to evaluate the anti-tumor activity and tolerance of Tepotinib in advanced NSCLC patients with METex14 skipping. According to the latest results, the overall response rate (ORR) was 51.4%, and the median progression-free survival (PFS) was 11.2 months. It is worth noting that Tepotinib exhibited a better response in treatment naive patients, with an ORR of 57.3% and a median PFS of 12.6 months. Among the patients in the trial, 34.8% had grade 3 or above adverse reactions, and fortunately, only 14.7% of the patients discontinued due to adverse reactions [9]. In addition, another phase II study (KCSG AL19-17) evaluating the efficacy and

safety of Tepotinib in 35 patients with advanced solid tumors carrying MET exon 14 skipping mutations or amplification also showed good efficacy and safety [10]. However, considering the limitations such the scale of the subjects and strict screening criteria, the safety of Tepotinib in the real-world environment still needs further study.

The FDA Adverse Event Reporting System (FAERS) systematically collects data on adverse drug reactions and medication errors reported spontaneously by medical staff and consumers, playing a crucial role in post-marketing safety monitoring of drugs [11].

These real-world data can help researchers identify potential safety signals and effectively complement the deficiencies found in pre-marketing studies. The purpose of this study is to comprehensively evaluate the real-world safety of Tepotinib by conducting an extensive analysis of the FAERS database, and to provide preliminary safety insights for health care professionals.

## Materials and methods

### Data sources

The FAERS database covers all marketed pharmaceuticals and therapeutic biologics that are subject to the FDA's post-marketing safety surveillance program. In addition to reports directly from patients and healthcare professionals, it includes AE reports that the FDA has obtained from manufacturers as mandated by law. The FAERS database comprises seven document types: Demographic (DEMO), adverse event coding (REAC), Drug Information (DRUG), Patient outcomes (OUTC), Reporting Source (RPSR), Start and End Dates of Reported Drugs (THER), and Indications for use/diagnosis (INDI). Although serving as a spontaneous reporting system, which inherently contains missing or inaccurate data, FAERS is one of the world's biggest databases for tracking adverse medication events. No informed consent or ethical approval was necessary for this study because FAERS data are publicly available and patient information in adverse reaction reports is anonymized.

### Data extraction

The relationship between drugs and AEs can be classified as primary suspect (PS), secondary suspect (SS), concomitant (C), and interaction (I). To more comprehensively describe the relationship between Tepotinib and AEs, both the generic name "Tepotinib" and the trade name "Tepmetko" were used as PS in the analysis. The study period was chosen from Q1 2021, the time when Tepotinib was first approved, to Q4 2024, as this represents the latest available data from the FAERS database at the time of conducting this study. This time frame ensures that the most recent and relevant data was included in the analysis. Preferred Terms (PTs) from the standardized Medical Dictionary for Regulatory Activities 27.1 (MedDRA), which covers 27 system organ classes (SOCs), were used to code the Tepotinib adverse occurrences. To guarantee the quality of the data utilized for analysis, we identified and corrected errors, inconsistencies, and missing values after the raw data was collected. And for the sake of precise identification of potential safety signals, we concentrated on SOC and PT levels for our pharmacovigilance investigation of Tepotinib. The detailed data mining process was shown in Fig 1. Relevant clinical characteristics, such as gender, age, reporting region, reporter identity, and reporting duration, were carefully gathered and described in addition to the AEs data.

### Statistical analysis

**Disproportionality analysis.** To explore the relationship between Tepotinib and AEs, this study used four descriptive statistical techniques to conduct a comprehensive analysis of the data, including Reporting Odds Ratio (ROR) [12], Proportional Reporting Ratio (PRR) [13], Bayesian Confidence Propagation Neural Network (BCPNN) [14], and Multi-Item Gamma Poisson Shrinkage (MGPS) [15]. The ROR and PRR approaches identify abnormally high adverse event reporting rates and highlight signals of AEs associated with Tepotinib. As an advanced algorithm, BCPNN is more adept at spotting potential connections between drug-adverse events. When measuring adverse event signals, the MGPS

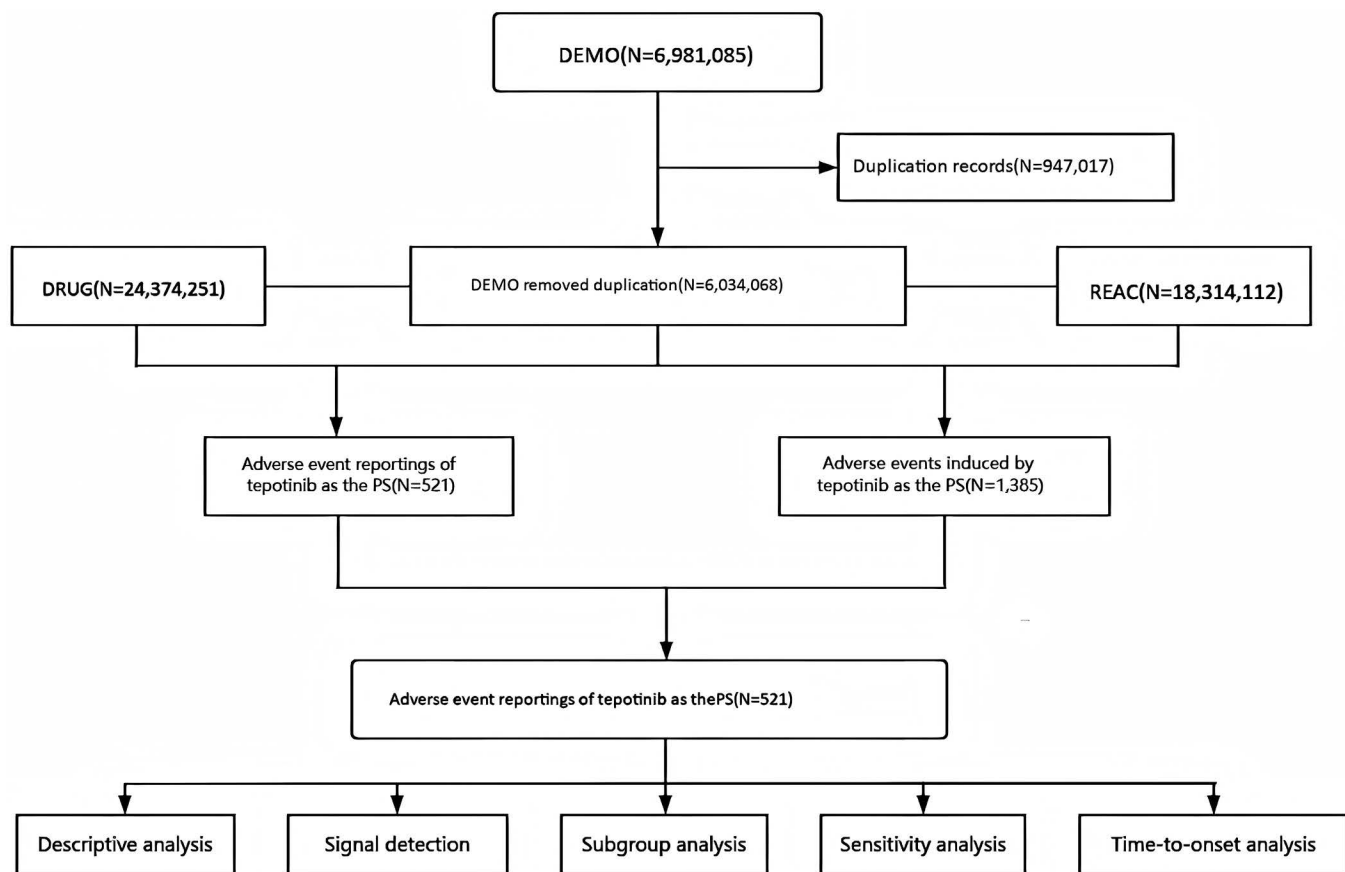

**Fig 1. Flowchart depicting the process of analyzing AEs related to Tepotinib using the FDA Adverse Event Reporting System.** Abbreviations: DEMO, demographics; DRUG, drug information; REAC, adverse events; PS, primary suspected.

<https://doi.org/10.1371/journal.pone.0339005.g001>

approach is more comprehensive since it considers both background hazards and the quantity of reports. All algorithms are based on a  $2 \times 2$  matrix table (S1 Table), determined by standard formulas to assess potential connections between Tepotinib and AEs (S2 Table). Positive signals were defined as AEs that met the criteria of at least one disproportionality analysis method.

**Time to Onset (TTO) and Weibull distribution analysis of AEs.** Time to Onset (TTO) for Tepotinib-related adverse events (AEs) was defined as the time interval between the AE onset date in the DEMO file and the drug start date in the THER file. For analytical convenience, all TTOs were consistently converted into days. We conducted a gender and age subgroup analysis of TTO. The Log-Rank test was used to analyze the differences among subgroups. Additionally, the Weibull distribution was applied to assess changes in the occurrence of AEs over time. All data processing and statistical analyses were performed using R (Version 4.4.1).

## Results

### Descriptive analysis

Throughout the surveillance period spanning from the first quarter of 2021 to the forth quarter of 2024, the FAERS database yielded a total of 6,981,085 reports. After strict selection and analysis, 521 AEs reports pertained to Tepotinib were analyzed. Among the Tepotinib-related AE reports, the impact was greater for female patients ( $n = 272$ , 52.2%) than for

male patients (n = 232, 44.5%). In terms of age distribution, the largest proportion of reports originated from the elderly population (aged 65 and above), accounted for 69.5%. Due to the lack of weight data in most cases, we were unable to accurately analyze the basic characteristics of the drug-using crowd. Concerning AE outcomes, death reports (n = 142, 27.3%) were the most frequently documented, followed by other serious outcomes (n = 133, 21.7%) and hospitalization (n = 86, 16.5%). And a small number of other serious AEs, including life-threatening (n = 4, 0.8%) and disability conditions (n = 3, 0.6%), were reported. Since the FDA approved Tepotinib in 2021, the year with the fewest cases was 2021 (n = 68, 13.1%), while the year with the most cases was 2023 (n = 208, 39.9%). Geographically, most adverse reaction reports came from United States (n = 256, 49.1%) and Japan (n = 118, 22.6%). Predominantly, reports were submitted by physician (n = 218, 41.8%) and consumers (n = 213, 40.9%). More detailed information on AE reports is provided in [Table 1](#).

### Distribution of AEs at the SOC level

A total of 25 SOC were recorded in AE reports related to Tepotinib, with specific signal strengths shown in [Table 2](#). The positive reported SOC included general disorders and administration site conditions, gastrointestinal disorders, investigations, respiratory, thoracic and mediastinal disorders, investigations, renal and urinary disorders, metabolism and nutrition disorders and ear and labyrinth disorders. Among them, renal and urinary disorders was the sole SOC that met all four algorithms simultaneously. In addition, ear and labyrinth disorders were not recorded on the drug label. [Fig 2](#) visually presents the distribution of AEs at the SOC level.

### Distribution of AEs at the PT level

A thorough signal detection investigation revealed 71 positive PTs, with [Table 3](#) depicting the top 50 AEs ranked by frequency among the positive signals. Common AEs including death, oedema peripheral, diarrhea, nausea and blood creatinine increased were consistent with established drug AE warnings. Notably, we identified some unexpected signals that were not mention in the safety profile: deafness and taste disorder. Additionally, all AEs that met the positive signal criteria are listed in [S3 Table](#).

### Subgroup analysis

Gender subgroup analysis revealed that among the 20 most frequently reported positive AEs, alopecia, deafness, and abdominal pain upper were exclusively observed in females, whereas interstitial lung disease, pruritus, and constipation were solely reported in males. Detailed information can be found in [S4 Table](#) and [S5 Table](#). Our age subgroup analysis showed that among the 20 most commonly reported positive AEs, only alopecia, pruritus, and anemia were observed in individuals under 75 years old, while dry skin, upper abdominal pain, and taste disorder occurred only in individuals aged 75 years and older. Specific details are available in [S6 Table](#) and [S7 Table](#).

### TTO and Weibull distribution analysis of Tepotinib-related AEs

Comprehensive and precise details on the time of occurrence was provided for 139 AEs that were reported from the Faers database. As [Fig 3](#) visualized, the onset of AEs was mainly concentrated in the first three months. In detail, the majority of AE instances took place in the first month (n = 61, 43.88%), second month (n = 25, 17.99%) and third month (n = 19, 13.67%) after Tepotinib initiation. The median onset time of these AEs was 39 days (interquartile range [IQR] 13.00–85.50 days). Based on the current sample scale, there was no statistical significance in the p-value of either gender or age subgroup. The median onset time of AEs in men and women was roughly similar. However, the median onset time of AEs in individuals aged 75 and over was 11 days shorter than that in individuals under 75 years old. The detailed results can be seen in [Fig 4](#). Calculated shape parameter ( $\beta$ ) of 0.83 with a 95% confidence interval (CI) range of 0.73 to 0.94 was found by evaluating the Weibull Shape Parameter analysis ([Table 4](#)). Notably, the Weibull Distribution result was a early-failure model, indicating the incidence of AEs was trending downward over time.

**Table 1. Clinical characteristics of Tepotinib adverse event reports from the FAERS database (Q1 2021 - Q4 2024).**

| Characteristics                 | Case numbers     | Case proportion (%) |
|---------------------------------|------------------|---------------------|
| Number of events                | 521              |                     |
| <b>Gender</b>                   |                  |                     |
| Male                            | 232              | 44.5                |
| Female                          | 272              | 52.2                |
| Miss                            | 17               | 3.3                 |
| <b>Age</b>                      |                  |                     |
| Median (IQR)                    | 76.0 (70.0-81.0) |                     |
| <18                             | 5                | 1                   |
| 18-65                           | 49               | 9.4                 |
| 65-85                           | 315              | 60.5                |
| >85                             | 47               | 9                   |
| Miss                            | 105              | 20.2                |
| <b>Top 5 Reported Countries</b> |                  |                     |
| United States                   | 256              | 49.1                |
| Japan                           | 118              | 22.6                |
| United kingdom                  | 18               | 3.5                 |
| Germany                         | 15               | 2.9                 |
| Belgium                         | 15               | 2.9                 |
| <b>Reporter</b>                 |                  |                     |
| Physician                       | 218              | 41.8                |
| Consumer                        | 213              | 40.9                |
| Health professional             | 42               | 8.1                 |
| Pharmacist                      | 30               | 5.8                 |
| Missing                         | 18               | 3.5                 |
| <b>Outcomes</b>                 |                  |                     |
| Death                           | 142              | 27.3                |
| Other serious outcomes          | 113              | 21.7                |
| Hospitalization                 | 86               | 16.5                |
| life-threatening                | 4                | 0.8                 |
| Disability conditions           | 3                | 0.6                 |
| Missing                         | 173              | 33.2                |
| <b>Reporting year</b>           |                  |                     |
| 2021                            | 68               | 13.1                |
| 2022                            | 104              | 20                  |
| 2023                            | 208              | 39.9                |
| 2024                            | 141              | 27.1                |

Abbreviation: interquartile range, IQR.

<https://doi.org/10.1371/journal.pone.0339005.t001>

## Discussion

This study conducted a comprehensive evaluation of AEs associated with Tepotinib since its market launch in 2021. We confirmed AEs listed on the drug label, including death, oedema peripheral, diarrhoea, fatigue and blood creatinine increased. Furthermore, novel signals such as deafness and taste disorder were identified. These findings offer insights into the real-world safety of Tepotinib, thus guiding its safer and more informed use in clinical practice.



**Table 2. Signal strength of Tepotinib AEs across System Organ Classes (SOC) in the FAERS database.**

| System Organ Class (SOC)                                            | Case numbers | ROR (95%CI)      | PRR ( <sup>2</sup> ) | EBGM(EBGM05) | IC(IC025)     |
|---------------------------------------------------------------------|--------------|------------------|----------------------|--------------|---------------|
| General Disorders And Administration Site Conditions*               | 410          | 1.96 (1.74-2.19) | 1.67 (134.78)        | 1.67 (1.52)  | 0.74 (0.58)   |
| Gastrointestinal Disorders*                                         | 180          | 1.78 (1.52-2.08) | 1.68 (53.20)         | 1.68 (1.47)  | 0.74 (0.52)   |
| Respiratory, Thoracic And Mediastinal Disorders*                    | 118          | 1.99 (1.65-2.40) | 1.91 (53.10)         | 1.90 (1.63)  | 0.93 (0.65)   |
| Investigations*                                                     | 114          | 1.46 (1.21-1.77) | 1.42 (15.33)         | 1.42 (1.21)  | 0.51 (0.23)   |
| Renal And Urinary Disorders*                                        | 80           | 3.48 (2.78-4.37) | 3.34 (133.46)        | 3.34 (2.76)  | 1.74 (1.41)   |
| Skin And Subcutaneous Tissue Disorders                              | 78           | 1.09 (0.87-1.37) | 1.08 (0.53)          | 1.08 (0.90)  | 0.12 (−0.22)  |
| Metabolism And Nutrition Disorders*                                 | 57           | 2.23 (1.71-2.91) | 2.18 (37.28)         | 2.18 (1.75)  | 1.13 (0.74)   |
| Infections And Infestations                                         | 51           | 0.63 (0.47-0.83) | 0.64 (10.83)         | 0.64 (0.51)  | −0.64 (−1.05) |
| Nervous System Disorders                                            | 46           | 0.45 (0.34-0.60) | 0.47 (29.95)         | 0.47 (0.37)  | −1.10 (−1.52) |
| Musculoskeletal And Connective Tissue Disorders                     | 46           | 0.64 (0.48-0.86) | 0.65 (9.05)          | 0.65 (0.51)  | −0.62 (−1.05) |
| Injury, Poisoning And Procedural Complications                      | 43           | 0.21 (0.16-0.29) | 0.24 (120.05)        | 0.24 (0.19)  | −2.07 (−2.51) |
| Cardiac Disorders                                                   | 24           | 0.92 (0.61-1.37) | 0.92 (0.17)          | 0.92 (0.66)  | −0.12 (−0.70) |
| Vascular Disorders                                                  | 20           | 0.79 (0.51-1.23) | 0.8 (1.05)           | 0.80 (0.55)  | −0.33 (−0.96) |
| Surgical And Medical Procedures                                     | 18           | 0.85 (0.53-1.35) | 0.85 (0.49)          | 0.85 (0.58)  | −0.24 (−0.90) |
| Psychiatric Disorders                                               | 17           | 0.22 (0.14-0.36) | 0.23 (45.81)         | 0.23 (0.16)  | −2.11 (−2.80) |
| Hepatobiliary Disorders                                             | 17           | 1.49 (0.93-2.41) | 1.49 (2.75)          | 1.49 (1.00)  | 0.57 (−0.11)  |
| Neoplasms Benign, Malignant And Unspecified (Incl Cysts And Polyps) | 15           | 0.25 (0.15-0.42) | 0.26 (32.32)         | 0.26 (0.17)  | −1.93 (−2.65) |
| Eye Disorders                                                       | 14           | 0.51 (0.30-0.86) | 0.51 (6.61)          | 0.51 (0.33)  | −0.96 (−1.71) |
| Ear And Labyrinth Disorders*                                        | 13           | 2.37 (1.37-4.10) | 2.36 (10.24)         | 2.36 (1.49)  | 1.24 (0.46)   |
| Blood And Lymphatic System Disorders                                | 10           | 0.41 (0.22-0.77) | 0.42 (8.33)          | 0.42 (0.25)  | −1.26 (−2.14) |
| Reproductive System And Breast Disorders                            | 4            | 0.51 (0.19-1.35) | 0.51 (1.93)          | 0.51 (0.22)  | −0.98 (−2.27) |
| Endocrine Disorders                                                 | 3            | 0.80 (0.26-2.49) | 0.80 (0.15)          | 0.80 (0.31)  | −0.32 (−1.76) |
| Social Circumstances                                                | 3            | 0.46 (0.15-1.43) | 0.46 (1.89)          | 0.46 (0.18)  | −1.12 (−2.56) |
| Product Issues                                                      | 3            | 0.11 (0.03-0.34) | 0.11 (22.05)         | 0.11 (0.04)  | −3.19 (−4.63) |
| Pregnancy, Puerperium And Perinatal Conditions                      | 1            | 0.23 (0.03-1.61) | 0.23 (2.64)          | 0.23 (0.04)  | −2.14 (−4.18) |

Abbreviation: Asterisks (\*) indicate statistically significant signals in algorithm; ROR, reporting odds ratio; PRR, proportional reporting ratio; EBGM, empirical Bayesian geometric mean; EBGM05, the lower limit of the 95% CI of EBGM; IC, information component; IC025, the lower limit of the 95% CI of the IC; CI, confidence interval; AEs, adverse events.

<https://doi.org/10.1371/journal.pone.0339005.t002>

In our study, death and peripheral edema were identified as the two most frequently reported AEs, consistent with the safety profile in the FDA drug label. The predominance of death is likely due to the MET exon 14 skipping mutation, which has been shown to be an independent prognostic factor for reduced survival in cancer patients [16]. Peripheral edema is a well-known AE listed on the drug label. In a long-term follow-up report of VISION, the incidence of peripheral edema was 67.1% [9]. And the analysis of Asian patients from VISION showed that peripheral edema was still the most common AE [17]. These findings are consistent with the results of this study. Although the exact mechanism of oedema has not been confirmed, some researchers believe that a potential mechanism is that the HGF/MET signaling pathway is inhibited, hindering the role of HGF in protecting vascular endothelium from excessive permeability damage caused by vascular endothelial growth factor (VEGF) [18]. In addition, patients with oedema may experience negative feelings such as pain, swelling, heaviness, and paresthesia of limbs. At the same time, the overall health status will also be affected, which increases the complexity of cancer patient management [19]. Therefore, prevention, early identification and intervention of oedema are particularly important. We recommend that healthcare professionals regularly assess the patients' weight and limb circumference and consider appropriate interventions such as exercise therapy, compression stockings, and diuretics.

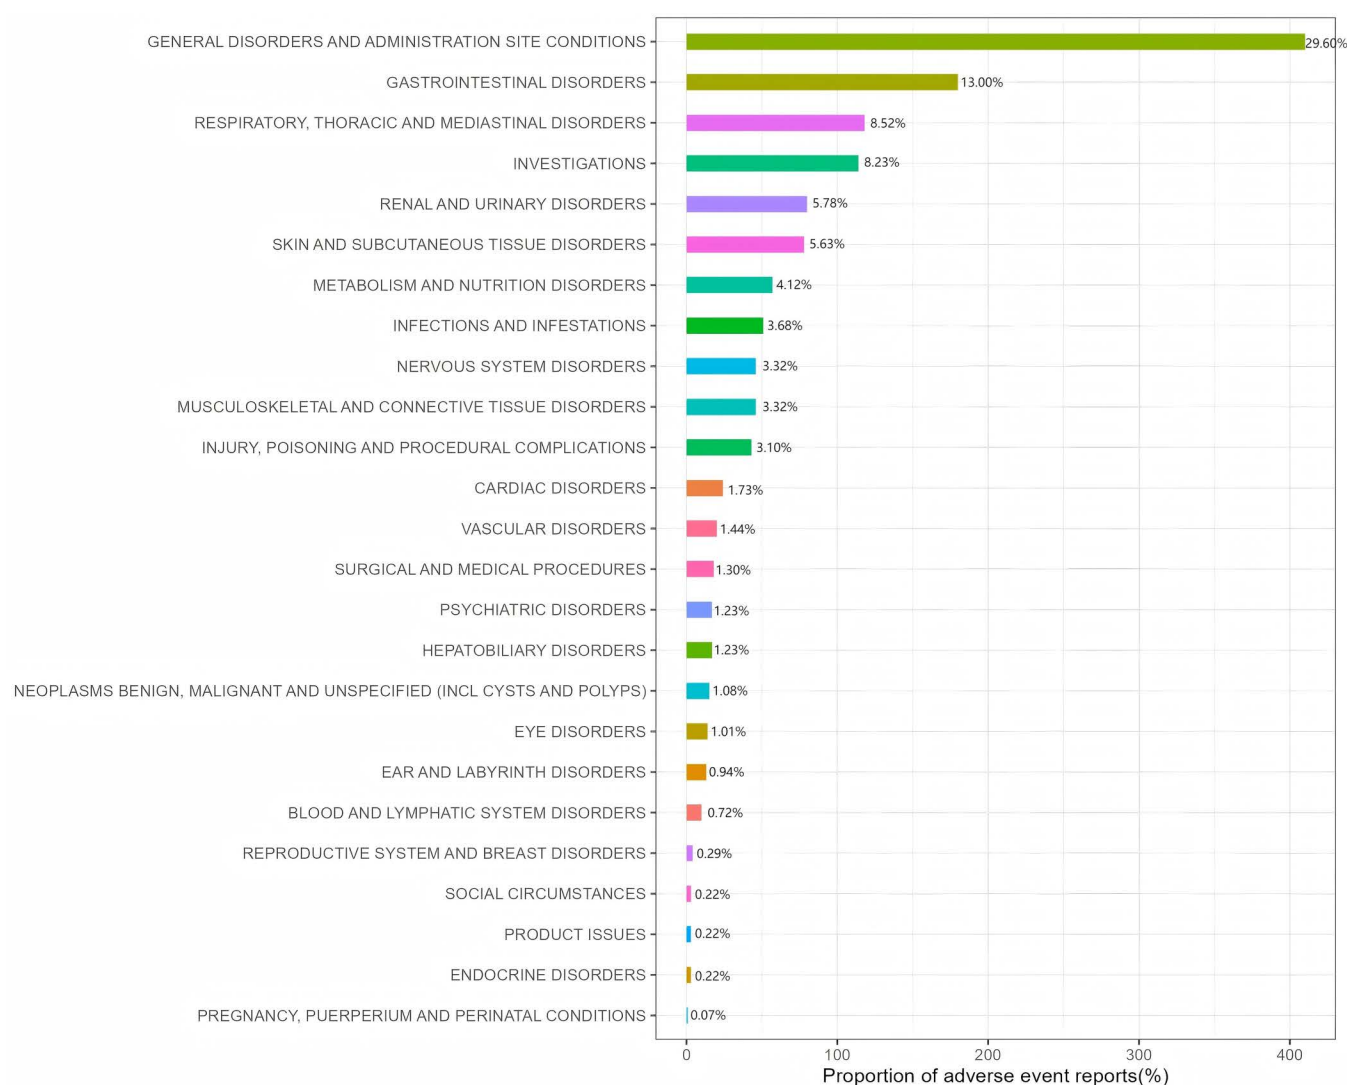

**Fig 2. Adverse event distribution across system organ classes for Tepotinib.**

<https://doi.org/10.1371/journal.pone.0339005.g002>

Blood creatinine increased is another known common adverse reaction, which has been confirmed by several studies [17,20]. It is worth noting that some preclinical studies have indicated that Tepotinib-related blood creatinine increased is a pseudo-renal injury. The potential mechanism of this pseudo-renal injury may involve the competitive inhibition of creatinine transporters in renal tubules. Specifically, organic anion transporter 2 (OAT2) is responsible for the basolateral absorption of creatinine, while MATE1 and MATE2-K (apically expressed multidrug and toxin efflux transporters) mediate the secretion of creatinine into urine. Tepotinib may lead to an increase in serum creatinine levels by inhibiting the function of these creatinine tubule transporters [21,22]. However, a clinical case from Japan reported confirmed tubulointerstitial injury following Tepotinib treatment, indicating a risk of true renal injury [23]. Therefore, reatinine levels in patients treated with tepotinib need to be carefully monitored over a long period of time to prevent further complications or deterioration of the original disease. We suggest that utilizing cystatin C, a renal function marker that is not affected by tubular transporter inhibitors, to estimate glomerular filtration rate (GFR) can help distinguish between true renal injury and pseudo-renal injury [24].



**Table 3. Top 50 frequency of adverse events at the PT level for Tepotinib.**

| PT                                    | Case numbers | ROR (95%CI)          | PRR (°)         | EBGM(EBGM05)  | IC(IC025)   |
|---------------------------------------|--------------|----------------------|-----------------|---------------|-------------|
| Death                                 | 107          | 6.06 (4.98-7.38)     | 5.67 (417.05)   | 5.67 (4.81)   | 2.50 (2.21) |
| Oedema Peripheral                     | 61           | 38.47 (29.75-49.75)  | 36.82 (2122.43) | 36.72 (29.62) | 5.20 (4.82) |
| Diarrhoea                             | 51           | 3.59 (2.71-4.74)     | 3.49 (91.60)    | 3.49 (2.76)   | 1.80 (1.40) |
| Fatigue                               | 45           | 2.55 (1.90-3.43)     | 2.50 (41.04)    | 2.50(1.95)    | 1.32 (0.89) |
| Oedema                                | 42           | 43.24 (31.79-58.82)  | 41.96 (1675.34) | 41.83 (32.34) | 5.39 (4.94) |
| Renal Impairment                      | 42           | 21.67 (15.93-29.46)  | 21.04 (801.50)  | 21.01 (16.24) | 4.39 (3.95) |
| Disease Progression                   | 40           | 13.2 (9.64-18.08)    | 12.85 (437.52)  | 12.83 (9.86)  | 3.68 (3.22) |
| Nausea                                | 38           | 2.52 (1.83-3.48)     | 2.48 (34.01)    | 2.48 (1.90)   | 1.31 (0.84) |
| Peripheral Swelling                   | 25           | 6.05 (4.07-8.99)     | 5.96 (103.49)   | 5.96 (4.28)   | 2.58 (2.00) |
| Blood Creatinine Increased            | 23           | 18.65 (12.35-28.17)  | 18.36 (377.26)  | 18.33 (12.98) | 4.20 (3.60) |
| Decreased Appetite                    | 23           | 4.50 (2.98-6.80)     | 4.45 (61.62)    | 4.44 (3.15)   | 2.15 (1.56) |
| Vomiting                              | 15           | 1.69 (1.01-2.81)     | 1.68 (4.16)     | 1.68 (1.10)   | 0.75 (0.02) |
| Pleural Effusion                      | 13           | 12.07 (6.99-20.85)   | 11.97 (130.64)  | 11.96 (7.57)  | 3.58 (2.80) |
| Constipation                          | 13           | 2.72 (1.58-4.70)     | 2.71 (14.04)    | 2.71 (1.71)   | 1.44 (0.66) |
| Interstitial Lung Disease             | 12           | 11.52 (6.52-20.33)   | 11.43 (114.14)  | 11.42 (7.09)  | 3.51 (2.71) |
| Weight Increased                      | 11           | 2.38 (1.31-4.30)     | 2.36 (8.69)     | 2.36 (1.44)   | 1.24 (0.40) |
| Swelling                              | 10           | 4.42 (2.37-8.23)     | 4.39 (26.24)    | 4.39 (2.61)   | 2.13 (1.26) |
| Generalised Oedema                    | 9            | 39.66 (20.57-76.47)  | 39.41 (335.98)  | 39.30 (22.69) | 5.30 (4.38) |
| Fluid Retention                       | 9            | 9.70 (5.03-18.68)    | 9.64 (69.71)    | 9.64 (5.57)   | 3.27 (2.35) |
| Hypoalbuminaemia                      | 8            | 50.34 (25.09-100.99) | 50.05 (383.18)  | 49.87 (27.85) | 5.64 (4.67) |
| Pulmonary Toxicity                    | 8            | 40.3 (20.09-80.84)   | 40.08 (303.93)  | 39.96 (22.32) | 5.32 (4.35) |
| Pulmonary Oedema                      | 7            | 8.67 (4.12-18.22)    | 8.63 (47.20)    | 8.62 (4.63)   | 3.11 (2.08) |
| Alanine Aminotransferase Increased    | 7            | 7.01 (3.33-14.73)    | 6.98 (35.84)    | 6.97 (3.74)   | 2.80 (1.78) |
| Lung Disorder                         | 7            | 6.57 (3.13-13.82)    | 6.55 (32.90)    | 6.54 (3.51)   | 2.71 (1.69) |
| General Physical Health Deterioration | 7            | 2.52 (1.20-5.29)     | 2.51 (6.37)     | 2.51 (1.35)   | 1.33 (0.30) |
| Dry Skin                              | 7            | 2.36 (1.13-4.97)     | 2.36 (5.49)     | 2.36 (1.27)   | 1.24 (0.21) |
| Pneumonitis                           | 6            | 9.14 (4.10-20.39)    | 9.11 (43.29)    | 9.10 (4.65)   | 3.19 (2.09) |
| Aspartate Aminotransferase Increased  | 6            | 7.12 (3.19-15.88)    | 7.09 (31.40)    | 7.09 (3.62)   | 2.83 (1.73) |
| Renal Failure                         | 6            | 2.48 (1.11-5.52)     | 2.47 (5.26)     | 2.47 (1.26)   | 1.30 (0.21) |
| Lymphoedema                           | 5            | 29.81 (12.38-71.81)  | 29.71 (138.42)  | 29.64 (14.21) | 4.89 (3.71) |
| Metastases To Central Nervous System  | 5            | 17.12 (7.11-41.22)   | 17.06 (75.53)   | 17.04 (8.17)  | 4.09 (2.91) |
| Pneumothorax                          | 5            | 14.62 (6.07-35.19)   | 14.57 (63.14)   | 14.55 (6.98)  | 3.86 (2.68) |
| Blood Sodium Decreased                | 5            | 13.85 (5.75-33.36)   | 13.81 (59.36)   | 13.80 (6.61)  | 3.79 (2.60) |
| Deafness                              | 5            | 9.02 (3.75-21.70)    | 8.99 (35.48)    | 8.98 (4.31)   | 3.17 (1.99) |
| Taste Disorder                        | 5            | 5.68 (2.36-13.66)    | 5.66 (19.19)    | 5.66 (2.71)   | 2.50 (1.32) |
| Renal Disorder                        | 5            | 5.10 (2.12-12.27)    | 5.08 (16.40)    | 5.08 (2.44)   | 2.34 (1.16) |
| Respiratory Failure                   | 5            | 4.11 (1.71-9.89)     | 4.10 (11.71)    | 4.10 (1.96)   | 2.03 (0.85) |
| Hepatic Enzyme Increased              | 5            | 3.05 (1.27-7.35)     | 3.05 (6.87)     | 3.04 (1.46)   | 1.61 (0.43) |
| Blood Albumin Decreased               | 4            | 34.43 (12.89-92)     | 34.34 (129.15)  | 34.25 (15.05) | 5.10 (3.80) |
| Nephropathy Toxic                     | 4            | 15.64 (5.86-41.75)   | 15.59 (54.58)   | 15.58 (6.85)  | 3.96 (2.67) |
| Hospice Care                          | 4            | 12.28 (4.60-32.79)   | 12.25 (41.31)   | 12.24 (5.38)  | 3.61 (2.32) |
| Pericardial Effusion                  | 4            | 8.78 (3.29-23.44)    | 8.76 (27.49)    | 8.76 (3.85)   | 3.13 (1.84) |
| Hepatotoxicity                        | 4            | 7.42 (2.78-19.79)    | 7.40 (22.12)    | 7.39 (3.25)   | 2.89 (1.59) |
| Hepatic Function Abnormal             | 4            | 4.84 (1.81-12.91)    | 4.83 (12.14)    | 4.82 (2.12)   | 2.27 (0.98) |
| Swelling Face                         | 4            | 3.53 (1.32-9.43)     | 3.53 (7.24)     | 3.52 (1.55)   | 1.82 (0.52) |
| Cardiac Failure                       | 4            | 2.49 (0.93-6.63)     | 2.48 (3.54)     | 2.48 (1.09)   | 1.31 (0.02) |

(Continued)

**Table 3.** (Continued)

| PT                          | Case numbers | ROR (95%CI)           | PRR (°)         | EBGM(EBGM05)  | IC(IC025)   |
|-----------------------------|--------------|-----------------------|-----------------|---------------|-------------|
| Malignant Pleural Effusion  | 3            | 100.62 (32.27-313.72) | 100.41 (293.03) | 99.66 (38.49) | 6.64 (5.19) |
| Infectious Pleural Effusion | 3            | 74.29 (23.85-231.36)  | 74.13 (215.24)  | 73.72 (28.50) | 6.20 (4.75) |
| Organising Pneumonia        | 3            | 24.32 (7.83-75.59)    | 24.27 (66.82)   | 24.23 (9.38)  | 4.60 (3.15) |
| Musculoskeletal Chest Pain  | 3            | 9.52 (3.07-29.58)     | 9.51 (22.82)    | 9.50 (3.68)   | 3.25 (1.80) |

Abbreviation: ROR, reporting odds ratio; PRR, proportional reporting ratio; EBGM, empirical Bayesian geometric mean; EBGM05, the lower limit of the 95% CI of EBGM; IC, information component; IC025, the lower limit of the 95% CI of the IC; CI, confidence interval; PT, preferred term.

<https://doi.org/10.1371/journal.pone.0339005.t003>

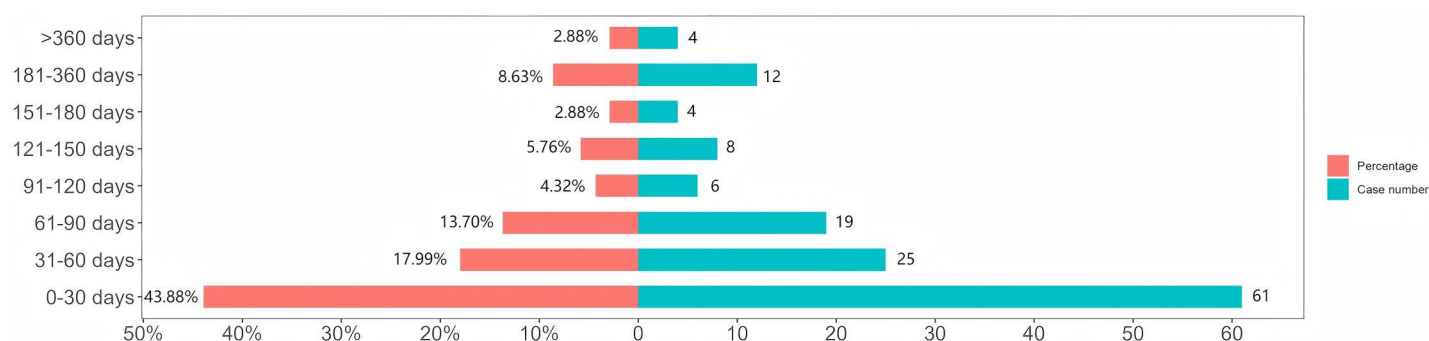

**Fig 3.** Time to onset of AEs associated with Tepotinib.

<https://doi.org/10.1371/journal.pone.0339005.g003>

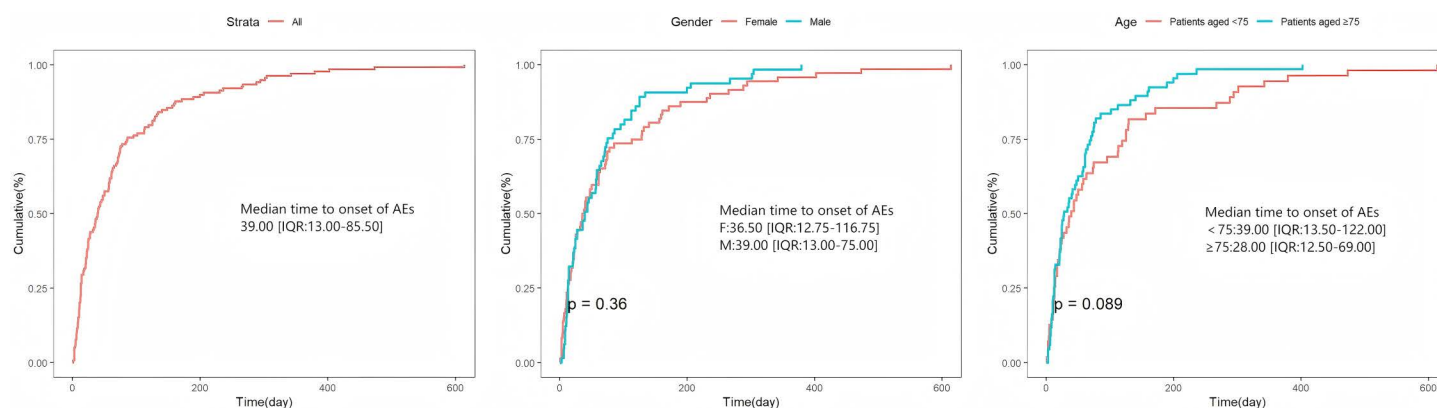

**Fig 4.** Time to onset of AEs associated with Tepotinib in subgroup analysis.

<https://doi.org/10.1371/journal.pone.0339005.g004>

Additionally, we identified several positive signals not mentioned: deafness and taste disorders. Deafness, as an unexpected AE, reached a positive threshold in all four imbalance analyses. Notably, drug-induced ototoxicity was also mentioned in the report of AEs of Capmatinib, another highly MET-selective inhibitor [25]. This suggests that ear and labyrinth disorders may be a potential class effect of MET inhibitors. Researchers believe that the pharmacological effects of MET inhibitors can lead to an unstable HGF/c-MET signaling pathway, which may cause deafness in patients by disrupting the development of stria vascularis. The stria vascularis is a non-sensory structure existing in the cochlear duct, which plays an important role in the balance of cochlear ions, the generation of cochlear potential and the formation of blood labyrinth

**Table 4. Weibull distribution analysis of Tepotinib-associated adverse events.**

| Drug      | Weibull distribution              |                                  |               |
|-----------|-----------------------------------|----------------------------------|---------------|
|           | Scale parameter: $\alpha$ (95%CI) | Shape parameter: $\beta$ (95%CI) | Type          |
| Tepotinib | 68.52(54.03–83.00)                | 0.83(0.73–0.94)                  | Early failure |

Abbreviation: CI, confidence interval; IQR, interquartile rang.

<https://doi.org/10.1371/journal.pone.0339005.t004>

barrier (BLB) [26]. The stria vascularis mainly consists of three types of cells: marginal cells, intermediate cells, and basal cells. It is worth noting that the intermediate cell layer is formed by the migration, differentiation and integration of melanocytes into the cochlea epithelium, and its loss has been shown to be associated with deafness and hair cell loss. More and more studies have shown that defects in the HGF/c-MET signaling pathway can lead to the inability of melanocytes to successfully integrate the intermediate cell layer, resulting in hearing impairment [27,28]. In addition, a study focused on the protective effect of HGF on aminoglycoside-induced ototoxicity, suggesting that it may help protect hair cells from death [29]. In summary, the unsteady HGF/c-MET signaling pathway may increase the risk of hearing loss by impairing the development of non-sensory cochlear structures and reducing ear protection. Previous studies have shown that hearing loss is related to cognitive dysfunction, social isolation behavior and depression, which may lead to a decline in patient compliance and further lead to poor quality of life [30–32]. In view of the potential negative effects, clinicians should monitor for ototoxicity and the psychological well-being of patients receiving tepotinib, with timely intervention as needed.

Taste disorders emerged as novel AEs in this study. As the symptoms are generally not life-threatening, they are often underestimated during cancer treatment. However, there have been studies showing that patients with taste disorders not only have loss of appetite, weight loss and malnutrition, but also are more likely to have significant neuropsychological symptoms, such as anxiety, depression and sleep disorders [33]. This underscores the necessity for comprehensive clinical assessment beyond mere symptom reporting. Taste disorders are usually associated with chemotherapy and radiotherapy [34]. And the leading hypotheses include direct gustatory cytotoxicity [35,36], oral mucositis and zinc deficiency [37,38]. In addition, a study of mice treated by vismodegib, a targeted drug for the treatment of basal-cell carcinoma, indicated that vismodegib can cause a significant reduction in the size of taste buds and the number of taste cells per taste bud, as well as the decrease also included Ki67 and Shh (Sonichedgehog) expressing cells in taste buds. At the same time, phospholipase C $\beta$ 2 and  $\alpha$ -gustducin-expressing cells responsible for sensing sweetness and bitterness, and T1R3, glucagon-like peptide-1 and glucagon expressing cells responsible for regulating sweetness sensitivity also experience reduction [39]. Nevertheless, future research is required to further reveal the potential relationship between tepotinib and taste disorders.

Gender-related subgroup analysis indicated that alopecia, deafness and abdominal pain upper require particular attention in females, while interstitial lung disease, pruritus and constipation may need to be noted in males. The occurrence of pruritus and anemia may be required to be monitored in patients under 75 years old, while dry skin and taste disorder may be advisable to be the focus of attention in those aged 75 years and over.

These findings provide new insights into the clinical application of Tepotinib in different genders and age groups, but further studies are needed to elucidate its underlying mechanisms.

Among the 139 AE reports obtained, the median onset time of Tepotinib-related AEs was 39 days (IQR = 13.00–85.50 days). Most AEs occurred within the first three months, with the highest incidence in the first month (n = 61, 43.9%). In this study, no significant effect of gender and age subgroups on the risk of AEs was found. It is worth noting that the median onset time of AEs in patients aged 75 years and over was 11 days shorter than that in patients under 75 years, suggesting that we still need to treat elderly patients with caution and incorporate more sample sizes in future studies to explore differences. In addition, the Weibull distribution model was used to simulate the occurrence of AE, and the results were consistent with the early failure model, indicating that the possibility of drug-induced AE decreased over time.

Even with the benefits of large-scale real-world research and the data mining methods utilized herein, there are still some existing constraints that should be carefully taken into account. First, the Faers database may naturally include incomplete or inaccurate data because it is a spontaneous reporting system that is submitted by groups such as consumers and physicians. Second, in view of the sample size of the subgroup study, our subgroup analysis is only based on the descriptive results of the current data. In the future, data of gender and age subgroups need to be further collected to further investigate these differences. Moreover, the Faers database was mainly derived from case reports. The disproportionality analysis carried out here did not determine risk or prove causation, but it did help show the strength of the AE signal. More research is required to elucidate the mechanisms of AEs and related risk factors in order to validate the possible adverse effects identified in this study. Notwithstanding the limitations above, our results act as an essential tool for medical practitioners, helping vigilantly monitor patients and ascertain the related AEs of Tepotinib.

## Conclusion

This study conducted a comprehensive evaluation of the real-world safety of Tepotinib based on the FAERS database. The study confirmed several known AEs, such as death, peripheral edema, and blood creatinine increased, requiring certain precautions to reduce the risk of medication. In addition, our analysis revealed some novel signals, including deafness and taste disorders. The cumulative incidence of AEs reached 43.88% within the first month of treatment, underscoring the necessity for intensive monitoring during this initial phase. This evidence provides initial real-world insights to guide safer clinical decision-making regarding Tepotinib. Further validation through large-scale prospective studies is warranted to substantiate these findings.

## Supporting information

**S1 Table. Two-by-two contingency table for disproportionality analyses.**

(DOCX)

**S2 Table. Four major algorithms used for signal detection.**

(DOCX)

**S3 Table. All adverse events meeting the positive signal threshold at the PT level.**

(DOCX)

**S4 Table. Top 20 most common positive adverse events of Tepotinib in males at the PT level.**

(DOCX)

**S5 Table. Top 20 most common positive adverse events of Tepotinib in females at the PT level.**

(DOCX)

**S6 Table. Top 20 most common positive adverse events of Tepotinib in patients under 75 years at the PT level.**

(DOCX)

**S7 Table. Top 20 most common positive adverse events of Tepotinib in patients aged 75 years and over at the PT level.**

(DOCX)

## Author contributions

**Conceptualization:** Su Wei, Xu Qi.

**Data curation:** Su Wei, Cuiping Liu.

**Formal analysis:** Su Wei, Lixi Zhang, Cuiping Liu.

**Funding acquisition:** Xu Qi.

**Methodology:** Su Wei, Cuiping Liu.

**Resources:** Lixi Zhang.

**Software:** Su Wei.

**Validation:** Su Wei, Lixi Zhang, Cuiping Liu.

**Visualization:** Su Wei.

**Writing – original draft:** Su Wei, Cuiping Liu.

**Writing – review & editing:** Lixi Zhang, Xu Qi.

## References

1. Bray F, Laversanne M, Sung H, Ferlay J, Siegel RL, Soerjomataram I, et al. Global cancer statistics 2022: GLOBOCAN estimates of incidence and mortality worldwide for 36 cancers in 185 countries. *CA Cancer J Clin.* 2024;74(3):229–63. <https://doi.org/10.3322/caac.21834> PMID: 38572751
2. Schabath MB, Cote ML. Cancer progress and priorities: lung cancer. *Cancer Epidemiol Biomarkers Prev.* 2019;28(10):1563–79. <https://doi.org/10.1158/1055-9965.EPI-19-0221> PMID: 31575553
3. Huang Q, Li Y, Huang Y, Wu J, Bao W, Xue C, et al. Advances in molecular pathology and therapy of non-small cell lung cancer. *Signal Transduct Target Ther.* 2025;10(1):186. <https://doi.org/10.1038/s41392-025-02243-6> PMID: 40517166
4. Recondo G, Che J, Jänne PA, Awad MM. Targeting MET dysregulation in cancer. *Cancer Discov.* 2020;10(7):922–34. <https://doi.org/10.1158/2159-8290.CD-19-1446> PMID: 32532746
5. Jørgensen JT, Urbanska EM, Møllerup J. MET targeted therapy in non-small cell lung cancer patients with MET exon 14-skipping mutations. *Transl Lung Cancer Res.* 2024;13(4):940–6. <https://doi.org/10.21037/tlcr-24-98> PMID: 38736494
6. Bogdanska W, Paik PK. From knowledge to action: the journey toward targeting the MET pathway via MET exon 14 skipping. *Cancer.* 2025;131 Suppl 1:e35782. <https://doi.org/10.1002/cncr.35782> PMID: 40172182
7. Mathieu LN, Larkins E, Akinboro O, Roy P, Amatya AK, Fiero MH, et al. FDA approval summary: capmatinib and tepotinib for the treatment of metastatic NSCLC harboring MET exon 14 skipping mutations or alterations. *Clin Cancer Res.* 2022;28(2):249–54. <https://doi.org/10.1158/1078-0432.CCR-21-1566> PMID: 34344795
8. Albers J, Friese-Hamim M, Clark A, Schadt O, Walter-Bausch G, Stroh C, et al. The preclinical pharmacology of tepotinib—a highly selective MET inhibitor with activity in tumors harboring MET alterations. *Mol Cancer Ther.* 2023;22(7):833–43. <https://doi.org/10.1158/1535-7163.MCT-22-0537> PMID: 36999986
9. Mazieres J, Paik PK, Garassino MC, Le X, Sakai H, Veillon R, et al. Tepotinib treatment in patients with MET exon 14-skipping non-small cell lung cancer: long-term follow-up of the VISION phase 2 nonrandomized clinical trial. *JAMA Oncol.* 2023;9(9):1260–6. <https://doi.org/10.1001/jamaoncol.2023.1962> PMID: 37270698
10. Kang EJ, Yang Y, Lee S, Kim YJ, Lim SM, Ahn M-J, et al. A phase II study of tepotinib in patients with advanced solid cancers harboring MET exon 14 skipping mutations or amplification (KCSG AL19-17). *ESMO Open.* 2024;9(9):103668. <https://doi.org/10.1016/j.esmoop.2024.103668> PMID: 39214049
11. Jia P, Zhou Y, Gao Y, Wang S, Yin J, Lian Y, et al. Real-world pharmacovigilance investigation of imipenem/cilastatin: signal detection using the FDA Adverse Event Reporting System (FAERS) database. *Front Pharmacol.* 2025;16:1524159. <https://doi.org/10.3389/fphar.2025.1524159> PMID: 40017596
12. Rothman KJ, Lanes S, Sacks ST. The reporting odds ratio and its advantages over the proportional reporting ratio. *Pharmacoepidemiol Drug Saf.* 2004;13(8):519–23. <https://doi.org/10.1002/pds.1001> PMID: 15317031
13. Evans SJ, Waller PC, Davis S. Use of proportional reporting ratios (PRRs) for signal generation from spontaneous adverse drug reaction reports. *Pharmacoepidemiol Drug Saf.* 2001;10(6):483–6. <https://doi.org/10.1002/pds.677> PMID: 11828828
14. Ang PS, Chen Z, Chan CL, Tai BC. Data mining spontaneous adverse drug event reports for safety signals in Singapore - a comparison of three different disproportionality measures. *Expert Opin Drug Saf.* 2016;15(5):583–90. <https://doi.org/10.1517/14740338.2016.1167184> PMID: 26996192
15. Rivkees SA, Szarfman A. Dissimilar hepatotoxicity profiles of propylthiouracil and methimazole in children. *J Clin Endocrinol Metab.* 2010;95(7):3260–7. <https://doi.org/10.1210/jc.2009-2546> PMID: 20427502
16. Cai X, Lin J, Li C, Xu T, Chen C, Lan B, et al. MET amplification correlates with poor prognosis and immunotherapy response as a subtype of melanoma: a multicenter retrospective study. *BMC Cancer.* 2024;24(1):1384. <https://doi.org/10.1186/s12885-024-13163-z> PMID: 39528978
17. Kato T, Yang JC-H, Ahn M-J, Sakai H, Morise M, Chen Y-M, et al. Efficacy and safety of tepotinib in Asian patients with advanced NSCLC with MET exon 14 skipping enrolled in VISION. *Br J Cancer.* 2024;130(10):1679–86. <https://doi.org/10.1038/s41416-024-02615-9> PMID: 38575731



18. Hack SP, Bruey J-M, Koeppen H. HGF/MET-directed therapeutics in gastroesophageal cancer: a review of clinical and biomarker development. *Oncotarget*. 2014;5(10):2866–80. <https://doi.org/10.18632/oncotarget.2003> PMID: 24930887
19. Gradalski T. Edema of advanced cancer: prevalence, etiology, and conservative management—a single hospice cross-sectional study. *J Pain Symptom Manage*. 2019;57(2):311–8. <https://doi.org/10.1016/j.jpainsymman.2018.11.005> PMID: 30453053
20. Morise M, Kato T, Matsumoto S, Inoue T, Sakamoto T, Tokito T, et al. Long-term experience with tepotinib in Japanese patients with MET exon 14 skipping NSCLC from the Phase II VISION study. *Cancer Sci*. 2024;115(4):1296–305. <https://doi.org/10.1111/cas.16107> PMID: 38402853
21. Chen MF, Harada G, Liu D, DeMatteo R, Falcon C, Wilhelm C, et al. Brief report: tyrosine kinase inhibitors for lung cancers that inhibit MATE-1 can lead to “false” decreases in renal function. *J Thorac Oncol*. 2024;19(1):153–9. <https://doi.org/10.1016/j.jtho.2023.09.1444> PMID: 37748692
22. Wijnltiet V, Roosens L, De Bondt C, Janssens A, Abramowicz D. Pseudo-acute kidney injury secondary to tepotinib. *Clin Kidney J*. 2022;16(4):760–1. <https://doi.org/10.1093/ckj/sfac180> PMID: 37007692
23. Oda N, Onishi A, Mitani R, Tokura T, Takata I. Kidney injury in patient with non-small-cell lung cancer receiving tepotinib. *Intern Med*. 2025;64(13):2019–23. <https://doi.org/10.2169/internalmedicine.4488-24> PMID: 39631863
24. Vanhoutte T, Sprangers B. Pseudo-AKI associated with targeted anti-cancer agents—the truth is in the eye of the filtration marker. *Clin Kidney J*. 2023;16(4):603–10. <https://doi.org/10.1093/ckj/sfad011> PMID: 37007700
25. Lin Y, Xu S, Deng M, Cao Y, Ding J, Lin T. Exploring ototoxicity associated with capmatinib: insights from a real-world data analysis of the FDA Adverse Event Reporting System (FAERS) database. *Clin Epidemiol*. 2025;17:513–21. <https://doi.org/10.2147/CLEP.S528454> PMID: 40486073
26. Johns JD, Adadey SM, Hoa M. The role of the stria vascularis in neglected otologic disease. *Hear Res*. 2023;428:108682. <https://doi.org/10.1016/j.heares.2022.108682> PMID: 36584545
27. Shibata S, Miwa T, Wu H-H, Levitt P, Ohya T. Hepatocyte growth factor-c-MET signaling mediates the development of nonsensory structures of the mammalian cochlea and hearing. *J Neurosci*. 2016;36(31):8200–9. <https://doi.org/10.1523/JNEUROSCI.4410-15.2016> PMID: 27488639
28. Morell RJ, Olszewski R, Tona R, Leitess S, Wafa TT, Taukulis I, et al. Noncoding microdeletion in mouse Hgf disrupts neural crest migration into the stria vascularis, reduces the endocochlear potential, and suggests the neuropathology for human nonsyndromic deafness DFNB39. *J Neurosci*. 2020;40(15):2976–92. <https://doi.org/10.1523/JNEUROSCI.2278-19.2020> PMID: 32152201
29. Uribe PM, Hudson AM, Lockard G, Jiang M, Harding J, Steyger PS, et al. Hepatocyte growth factor mimetic confers protection from aminoglycoside-induced hair cell death in vitro. *Hear Res*. 2023;434:108786. <https://doi.org/10.1016/j.heares.2023.108786> PMID: 37192594
30. Stickel AM, Mendoza A, Tarraf W, Kuwayama S, Kaur S, Morlett Paredes A, et al. Hearing loss and associated 7-year cognitive outcomes among hispanic and latino adults. *JAMA Otolaryngol Head Neck Surg*. 2024;150(5):385–92. <https://doi.org/10.1001/jamaoto.2024.0184> PMID: 38512278
31. Shukla A, Harper M, Pedersen E, Goman A, Suen JJ, Price C, et al. Hearing loss, loneliness, and social isolation: a systematic review. *Otolaryngol Head Neck Surg*. 2020;162(5):622–33. <https://doi.org/10.1177/0194599820910377> PMID: 32151193
32. Lawrence BJ, Jayakody DMP, Bennett RJ, Eikelboom RH, Gasson N, Friedland PL. Hearing loss and depression in older adults: a systematic review and meta-analysis. *Gerontologist*. 2020;60(3):e137–54. <https://doi.org/10.1093/geront/gnz009> PMID: 30835787
33. Spencer AS, da Silva Dias D, Capelas ML, Pimentel F, Santos T, Neves PM, et al. Managing severe dysgeusia and dysosmia in lung cancer patients: a systematic scoping review. *Front Oncol*. 2021;11:774081. <https://doi.org/10.3389/fonc.2021.774081> PMID: 34881185
34. Buttiron Webber T, Briata IM, DeCensi A, Cevasco I, Paleari L. Taste and smell disorders in cancer treatment: results from an integrative rapid systematic review. *Int J Mol Sci*. 2023;24(3):2538. <https://doi.org/10.3390/ijms24032538> PMID: 36768861
35. Barlow LA. Progress and renewal in gustation: new insights into taste bud development. *Development*. 2015;142(21):3620–9. <https://doi.org/10.1242/dev.120394> PMID: 26534983
36. Mukherjee N, Pal Choudhuri S, Delay RJ, Delay ER. Cellular mechanisms of cyclophosphamide-induced taste loss in mice. *PLoS One*. 2017;12(9):e0185473. <https://doi.org/10.1371/journal.pone.0185473> PMID: 28950008
37. Cowart BJ. Taste dysfunction: a practical guide for oral medicine. *Oral Dis*. 2011;17(1):2–6. <https://doi.org/10.1111/j.1601-0825.2010.01719.x> PMID: 20796233
38. Zhang B, Zhang N, Zhang Y, Yan J, Chen L, He H, et al. Prevalence and risk factors of chemotherapy-induced taste alterations among cancer patients: a systematic review and meta-analysis. *Eur J Oncol Nurs*. 2025;74:102735. <https://doi.org/10.1016/j.ejon.2024.102735> PMID: 39579474
39. Yang H, Cong W-N, Yoon JS, Egan JM. Vismodegib, an antagonist of hedgehog signaling, directly alters taste molecular signaling in taste buds. *Cancer Med*. 2015;4(2):245–52. <https://doi.org/10.1002/cam4.350> PMID: 25354792
